# Supplementary material for: A broad and potent neutralization epitope in SARS-related coronaviruses
Source: PubMed Central journal article supplement (PMC9304036; doi:10.1073/pnas.2205784119), 2022-06-29
Supplement: pnas.2205784119.sapp.pdf [file pnas.2205784119.sapp.pdf]

1  
2  
3  
4  
5  
6 **Supplementary Information for**  
7

8 **A broad and potent neutralization epitope in**  
9 **SARS-related coronaviruses**

10 Meng Yuan<sup>a,1</sup>, Xueyong Zhu<sup>a,1</sup>, Wan-ting He<sup>b,c,d</sup>, Panpan Zhou<sup>b,c,d</sup>, Chengzi I. Kaku<sup>e</sup>, Tazio  
11 Capozzola<sup>b</sup>, Connie Y. Zhu<sup>a</sup>, Xinye Yu<sup>a</sup>, Hejun Liu<sup>a</sup>, Wenli Yu<sup>a</sup>, Yuanzi Hua<sup>a</sup>, Henry Tien<sup>a</sup>,  
12 Linghang Peng<sup>b</sup>, Ge Song<sup>b</sup>, Christopher A. Cottrell<sup>b,c,d</sup>, William R. Schief<sup>b,c,d,g</sup>, David Nemazee<sup>b</sup>,  
13 Laura M. Walker<sup>e,f</sup>, Raiees Andrabi<sup>b,c,d</sup>, Dennis R. Burton<sup>b,c,d,g</sup>, Ian A. Wilson<sup>a,c,d,h,\*</sup>

14  
15 <sup>a</sup> Department of Integrative Structural and Computational Biology, The Scripps Research Institute,  
16 La Jolla, CA 92037, USA

17 <sup>b</sup> Department of Immunology and Microbiology, The Scripps Research Institute, La Jolla, CA 92037,  
18 USA

19 <sup>c</sup> IAVI Neutralizing Antibody Center, The Scripps Research Institute, La Jolla, CA 92037, USA

20 <sup>d</sup> Consortium for HIV/AIDS Vaccine Development (CHAVD), The Scripps Research Institute, La  
21 Jolla, CA 92037, USA

22 <sup>e</sup> Adimab, LLC, Lebanon, NH 03766, USA

23 <sup>f</sup> Adagio Therapeutics, Inc., Waltham, MA 02451, USA

24 <sup>g</sup> Ragon Institute of Massachusetts General Hospital, Massachusetts Institute of Technology, and  
25 Harvard University, Cambridge, MA 02139, USA

26 <sup>h</sup> The Skaggs Institute for Chemical Biology, The Scripps Research Institute, La Jolla, CA, 92037,  
27 USA

28 <sup>1</sup> M.Y. and X.Z. contributed equally to this work

29 \* **Corresponding author:** Ian A. Wilson. **Email:** [wilson@scripps.edu](mailto:wilson@scripps.edu)

30  
31 **This PDF file includes:**

32 Figures S1 to S10

33 Tables S1 to S3

34 SI References  
35

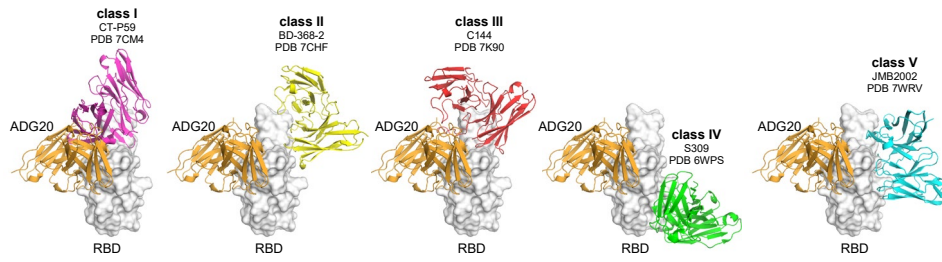

36

37

**Fig. S1. The epitope of ADG20 is distinct from any of the antibody classes I-V analyzed in**

38

**Yin et al. (1).**

39

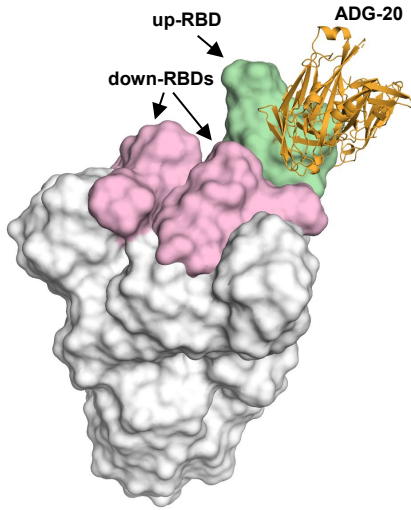

40

41 **Fig. S2. Modelling the binding of ADG-20 on the homotrimeric spike (S) protein.** The SARS-  
42 CoV-2 S trimer is shown with one RBD in the up conformation (green) and two RBDs in the down  
43 conformation (pink). PDB 7ND9 was used in the modeling (2). The complete epitope of ADG-20 is  
44 accessible only when the RBD is in the up, but not in the down, conformation.

45

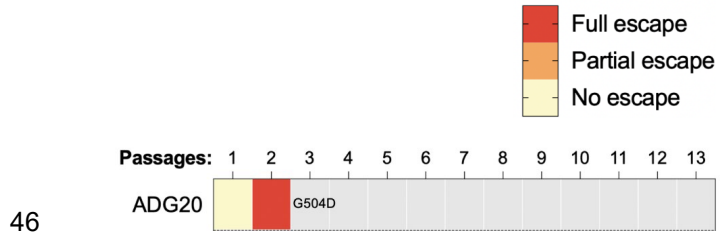

46

47 **Fig. S3. An escape mutant of authentic SARS-CoV-2 against ADG-20.** An in vitro SARS-CoV-2

48 G504D mutant escapes neutralization by ADG-20.

49

|                           |           | SARS-CoV-2 |             |             |             |             |             |             | Other SARS-related coronaviruses |             |             |             |             |             |             |           |               |  |
|---------------------------|-----------|------------|-------------|-------------|-------------|-------------|-------------|-------------|----------------------------------|-------------|-------------|-------------|-------------|-------------|-------------|-----------|---------------|--|
|                           |           | Wuhan      | Alpha       | Beta        | Gamma       | Delta       | Omicron     | SARS-CoV-1  | WIV1                             | SHC014      | RaTG13      | BtKY72      | pang17      | Hub2013     | Rc-o319     | YN2013    | Cp-Yunnan2011 |  |
| RBS-A<br>(Class 1)        | CC12.3    | 10-100 nM  | 10-100 nM   |             |             | 1-10 nM     |             |             |                                  |             |             |             |             |             |             |           |               |  |
|                           | LY-CoV16  | 10-100 nM  | 10-100 nM   |             |             | 1-10 nM     |             |             |                                  |             |             |             |             |             |             |           |               |  |
| RBS-B<br>(Class 2)        | C121      | 1-10 nM    | 1-10 nM     |             |             | 10-100 nM   |             |             |                                  |             |             |             |             |             |             |           |               |  |
|                           | REGN10933 | 1-10 nM    | 1-10 nM     | 100-1000 nM | 100-1000 nM | < 1 nM      | 100-1000 nM |             |                                  |             |             |             |             |             |             |           |               |  |
|                           | LY-CoV555 | 1-10 nM    | 1-10 nM     |             |             | 100-1000 nM |             |             |                                  |             |             |             |             |             |             |           |               |  |
|                           | AZD8895   | 1-10 nM    | 1-10 nM     | 10-100 nM   | 10-100 nM   | 1-10 nM     | 100-1000 nM |             |                                  | 10-100 nM   |             | 10-100 nM   |             |             |             |           |               |  |
|                           | C144      | 10-100 nM  | 10-100 nM   |             |             | 10-100 nM   |             |             |                                  |             |             |             |             |             |             |           |               |  |
| RBS-C<br>(Class 2)        | CV07-270  | 10-100 nM  | 10-100 nM   |             |             |             |             |             |                                  |             |             |             |             |             |             |           |               |  |
|                           | BD-368-2  | 10-100 nM  | 10-100 nM   |             |             |             |             |             |                                  |             |             |             |             |             |             |           |               |  |
| RBS-D<br>(Class 3)        | REGN10987 | 10-100 nM  | 1-10 nM     | 1-10 nM     | 1-10 nM     | 1-10 nM     |             |             |                                  |             |             |             |             |             |             |           |               |  |
|                           | AZD1061   | 1-10 nM    | 1-10 nM     | 1-10 nM     | 1-10 nM     | 1-10 nM     | 10-100 nM   |             |                                  |             |             |             |             |             |             |           |               |  |
| RBS-D/CR3022<br>(Class 4) | ADG20     | < 1 nM     | < 1 nM      | < 1 nM      | < 1 nM      | < 1 nM      | 10-100 nM   | < 1 nM      | < 1 nM                           | < 1 nM      | < 1 nM      | 1-10 nM     | 10-100 nM   |             | 100-1000 nM |           |               |  |
|                           | ADI-55688 | 10-100 nM  | 100-1000 nM | 100-1000 nM | 100-1000 nM | 10-100 nM   |             | < 1 nM      | < 1 nM                           | < 1 nM      | 100-1000 nM |             |             |             |             |           |               |  |
|                           | DH1047    | 1-10 nM    | 1-10 nM     | 1-10 nM     | 1-10 nM     | 1-10 nM     | 10-100 nM   | < 1 nM      | < 1 nM                           | < 1 nM      | < 1 nM      | 10-100 nM   | 10-100 nM   | 100-1000 nM | 10-100 nM   | 10-100 nM |               |  |
|                           | S2X259    | < 1 nM     | < 1 nM      | < 1 nM      | < 1 nM      | < 1 nM      |             | < 1 nM      | < 1 nM                           | < 1 nM      | < 1 nM      | 10-100 nM   | 10-100 nM   |             |             |           |               |  |
|                           | K398.22   | < 1 nM     | < 1 nM      | < 1 nM      | < 1 nM      | < 1 nM      | n.a.        | < 1 nM      | < 1 nM                           | < 1 nM      | < 1 nM      |             |             |             |             |           |               |  |
| CR3022<br>(Class 4)       | CR3022    | 10-100 nM  | 1-10 nM     | 1-10 nM     | 1-10 nM     | 1-10 nM     | 10-100 nM   | < 1 nM      | < 1 nM                           | < 1 nM      | 10-100 nM   | 10-100 nM   | 100-1000 nM |             | 100-1000 nM |           |               |  |
|                           | COVA1-16  | 10-100 nM  | 1-10 nM     | 1-10 nM     | 1-10 nM     | 1-10 nM     | 10-100 nM   | 100-1000 nM | 100-1000 nM                      | 100-1000 nM |             | 100-1000 nM |             |             |             |           |               |  |
| S309<br>(Class 3)         | S309      | 10-100 nM  | 1-10 nM     | 1-10 nM     | 1-10 nM     | 1-10 nM     | 10-100 nM   | < 1 nM      | 100-1000 nM                      | 10-100 nM   |             | 10-100 nM   |             | 10-100 nM   |             |           |               |  |

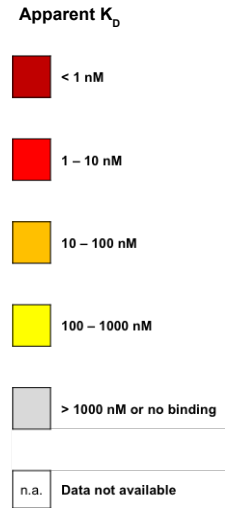

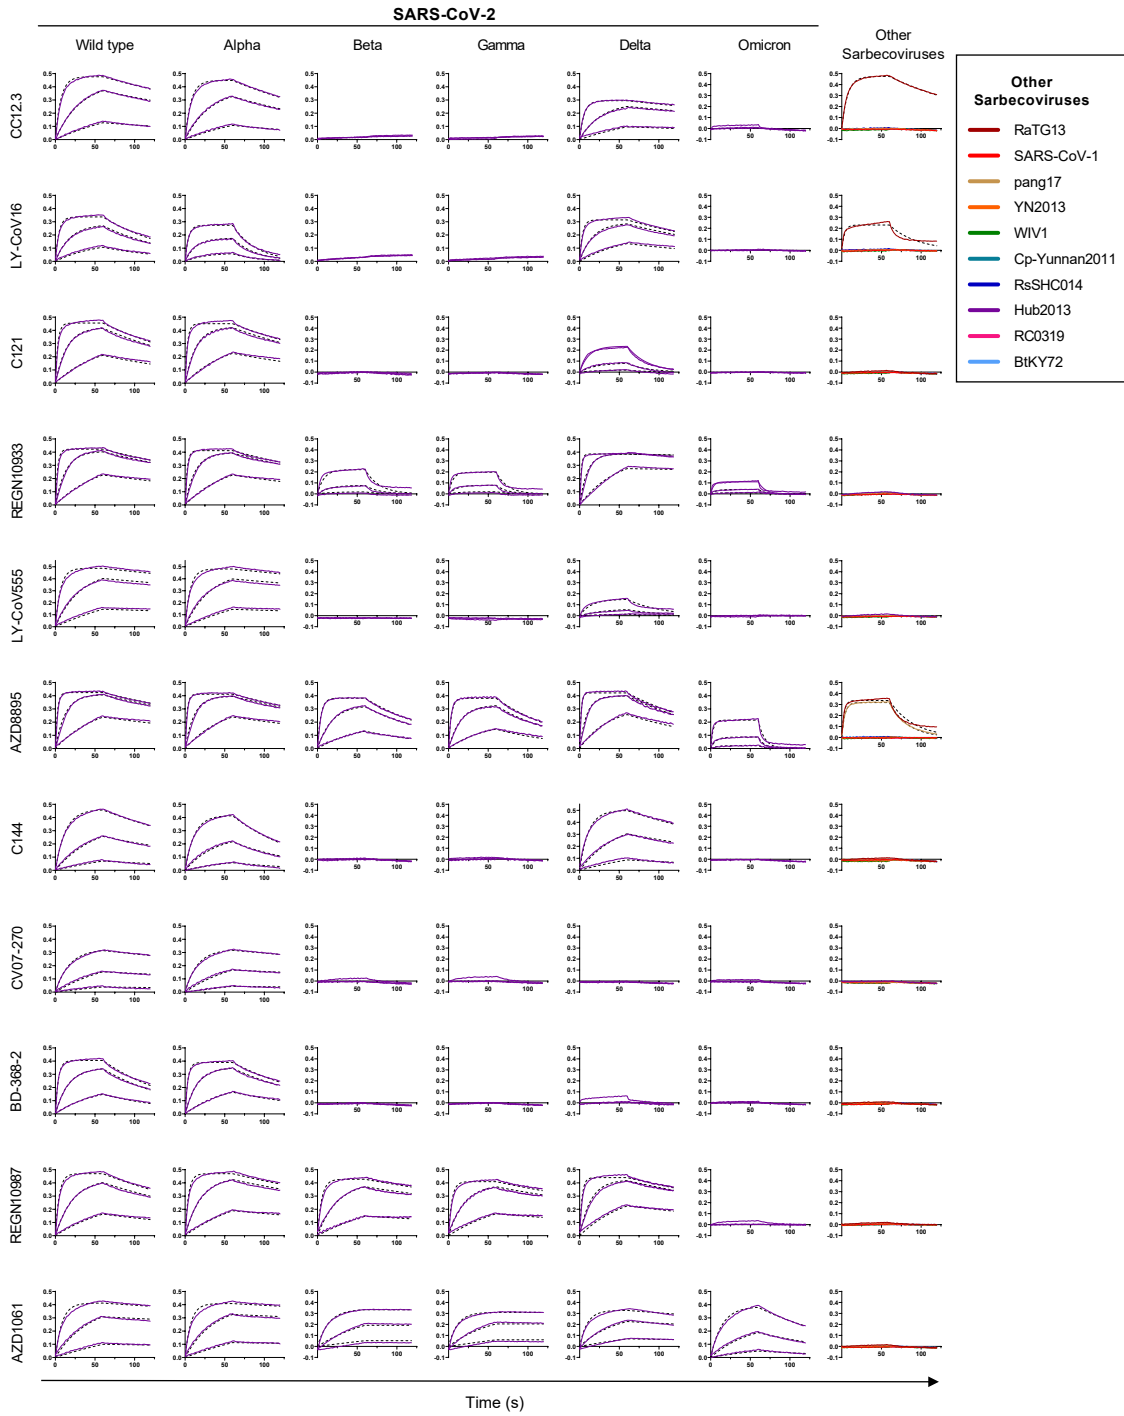

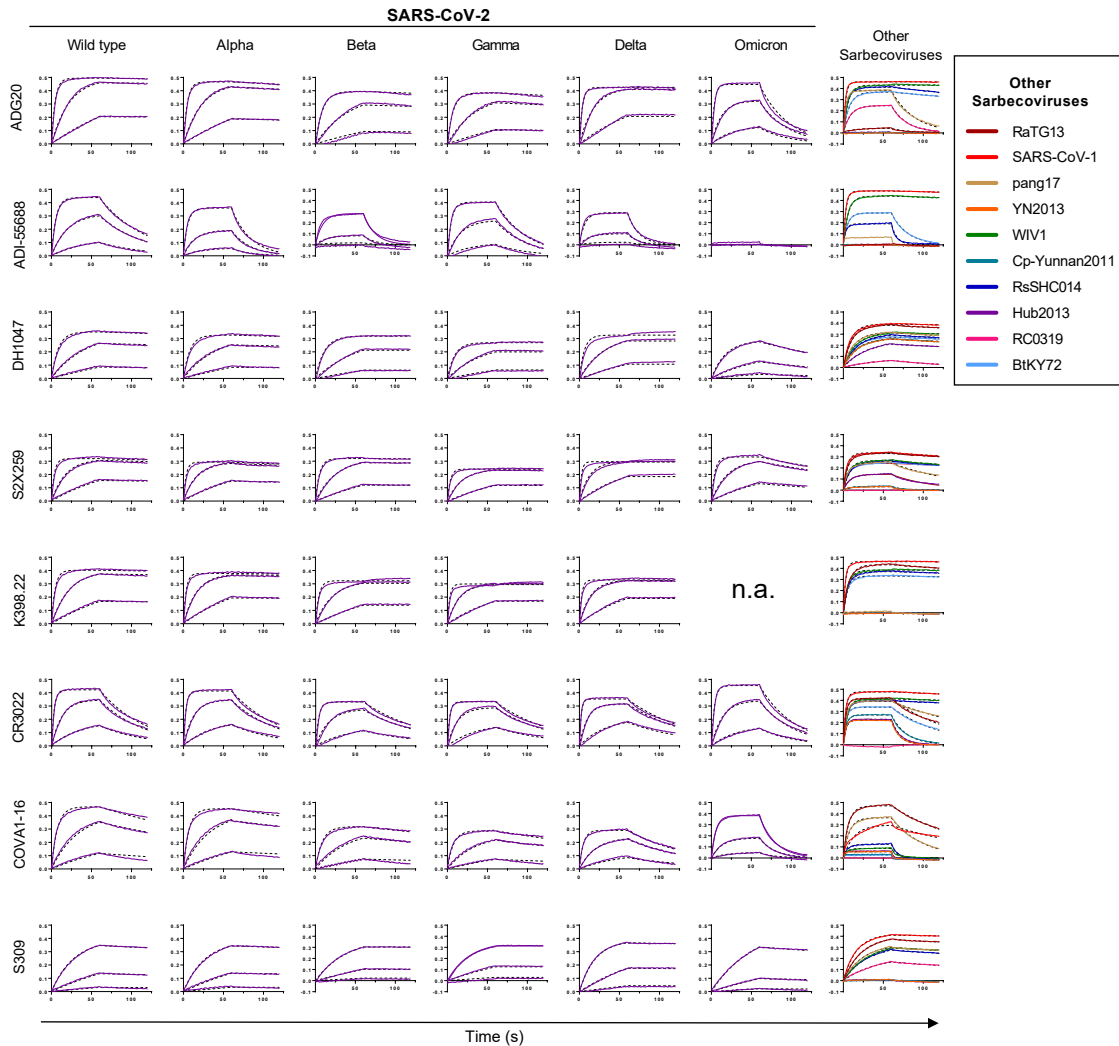

57

58

59 **Fig. S4. Binding affinity of antibodies with coronavirus spike RBDs.** (A) BioLayer  
 60 interferometry (BLI) was used to assess the apparent  $K_D$ , where the IgGs were captured on the  
 61 sensors and the RBD proteins flowed over. Epitope classification of the RBD antibodies that we  
 62 previously defined (3) is shown in the left column, with the approximate corresponding classes  
 63 defined in (4) shown in brackets. n.a. not available. (B-C) Sensorgrams for binding of IgGs and  
 64 RBDs. The y-axis represents the response against different concentrations of RBD (x-axis in time,  
 65 seconds). Solid lines represent the response curves and dashed lines represent the 1:1 binding  
 66 model. The IgGs were loaded onto anti-human IgG Fc (AHC) biosensors and interacted with 5-fold

67 gradient dilution (500 nM – 20 nM) of SARS-CoV-2 RBDs, and 500 nM of RBDs of other  
68 sarbecoviruses.



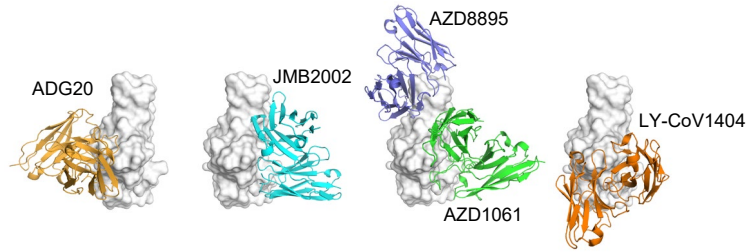

69

70 **Fig. S5. Relative locations of ADG-20 and other RBD-targeting antibodies on the RBD.** The  
71 structures of complexes JMB2002/RBD (PDB: 7WRV), AZD8895/AZD1061/RBD (7L7E), and LY-  
72 CoV1404/RBD (7MMO) were superimposed via their RBDs onto the structure of ADG20/RBD  
73 determined in this study. RBD is shown in a white surface, while antibodies are in cartoon  
74 representation. For clarity, only the variable domains of the antibodies are shown.

75

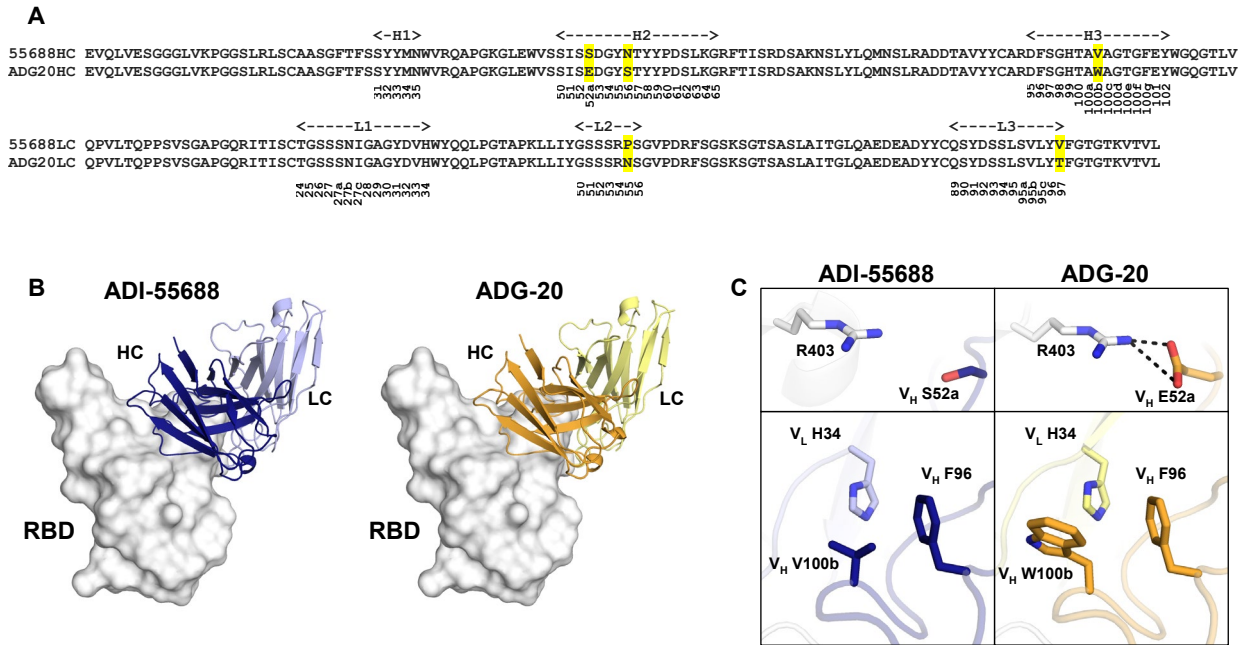

76

77 **Fig. S6. Comparison between ADG-20 and its parent antibody ADI-55688.** (A) Sequence  
 78 alignment between ADG-20 and its parent antibody ADI-55688. Different residues are highlighted  
 79 in yellow. Kabat numbering is shown under the CDR sequences. (B) Structural comparison  
 80 between ADI-55688 and ADG-20. Both antibodies target the same epitope on SARS-CoV-2 RBD  
 81 (white) in an identical binding mode. (C) Detailed interactions of the SARS-CoV-2 RBD with ADI-  
 82 55688 and ADG-20. In B and C, heavy and light chains of ADI-55688 are shown in dark and light  
 83 blue, and those of ADG-20 in orange and yellow. The RBD surface is shown in white. Hydrogen  
 84 bonds are represented by black dashed lines.

85

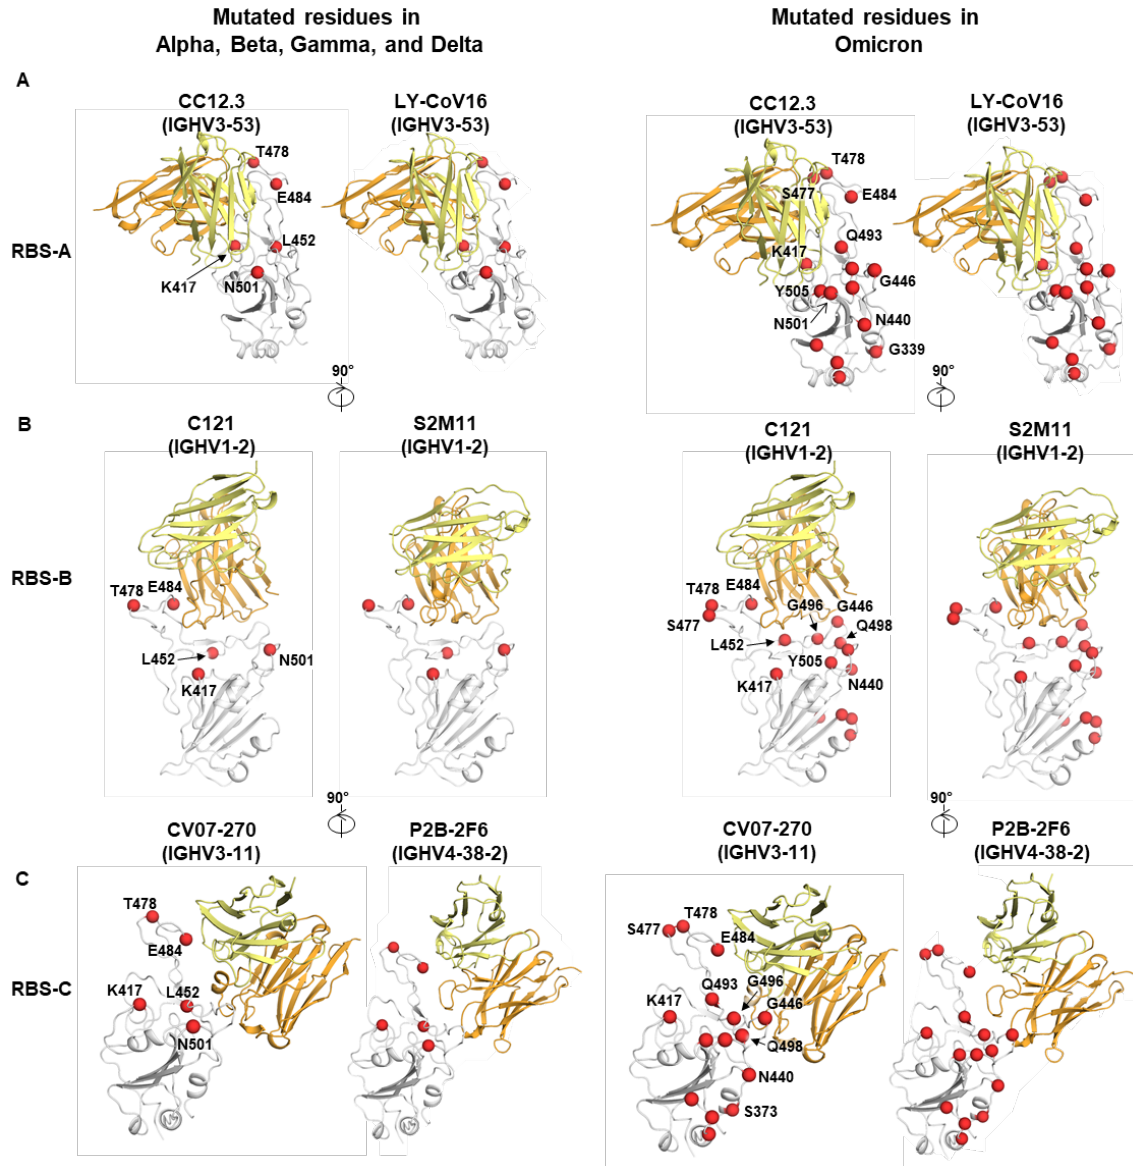

86

87 **Fig. S7. Structures of representative antibodies targeting epitopes RBS-A, B, and C.** SARS-  
 88 CoV-2 RBD is represented by a white cartoon with mutated residues in VOCs shown as red  
 89 spheres, where VOCs Alpha, Beta, Gamma, and Delta are shown in the left panels and Omicron  
 90 in the right panels. Structures are shown in a same view in each panel. Labelling of some  
 91 residues are omitted in the right panels for clarity. Heavy and light chains of the bound antibodies  
 92 are shown in orange and yellow, respectively. Only the variable domains of the antibodies are  
 93 shown. Structures used for the representative antibodies: CC12.3 (PDB: 6XC4), LY-CoV16/CB6  
 94 (7C01), C121 (7K8X), S2M11 (7K43), CV07-270 (6XKP), and P2B-2F6 (7BWJ).

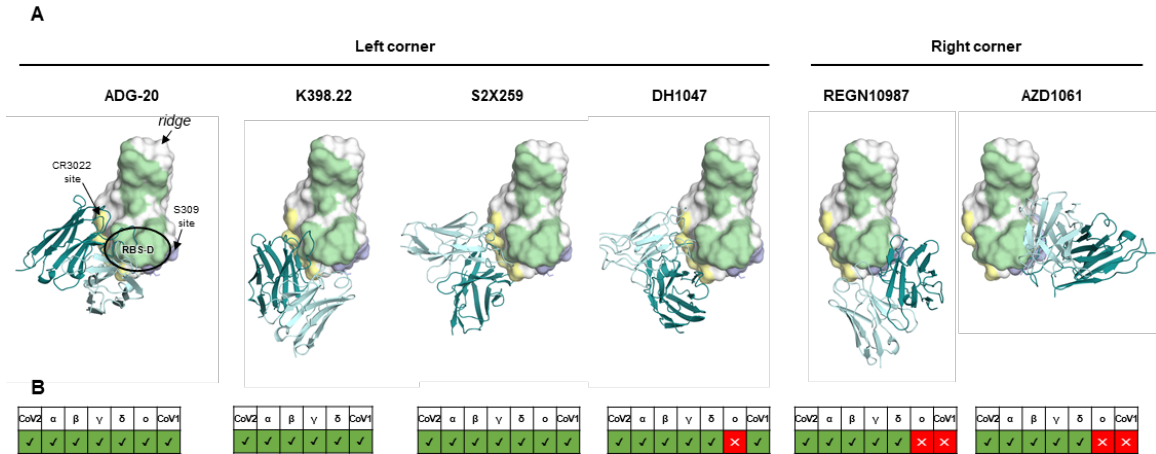

95

96 **Fig. S8. Structural and functional comparison of antibodies targeting opposite corners of**

97 **RBS-D.** (A) Structures of RBS-D antibodies. SARS-CoV-2 RBD is shown as white surface with

98 the RBS, CR3022 site and S309 site in green, yellow, and blue, respectively. Heavy and light

99 chains of antibodies are shown as dark and light teal cartoons, respectively. The RBS-D region is

100 highlighted with a black circle in the ADG-20 panel. All panels are in the same view. Structures

101 used in this figure: ADG-20 (this study, PDB 7U2D), S2X259 (PDB 7RAL) (5), DH1047 (PDB

102 7LD1) (6), K398.22 (7), REGN10987 (PDB 6XDG) (8), AZD1061 (PDB 7L7E) (9). (B)

103 Neutralization of each antibody against SARS-CoV-2 and VOCs, as well as SARS-CoV-1. Each

104 panel corresponds to the complex immediately above in (A). Antibodies with detectable

105 neutralization are shown in a green “✓” while a red “✗” represents no neutralization. Omicron

106 data for K398.22 are not available.

107

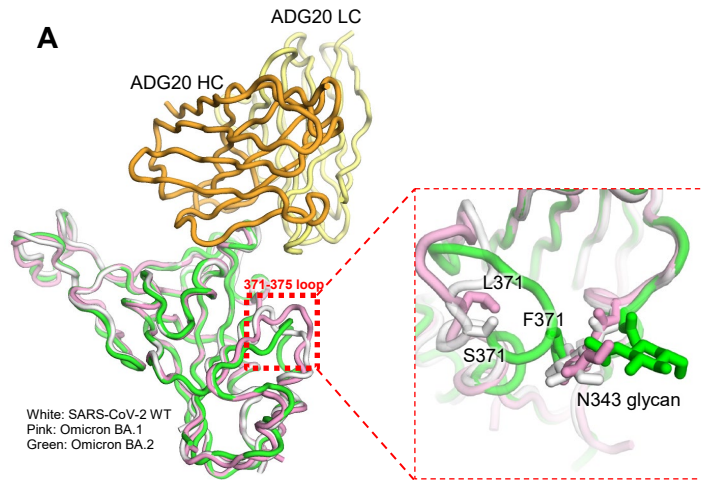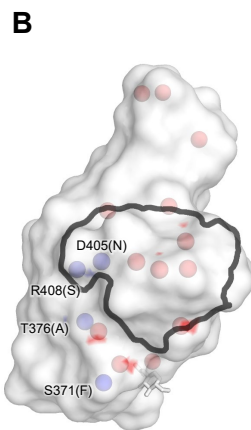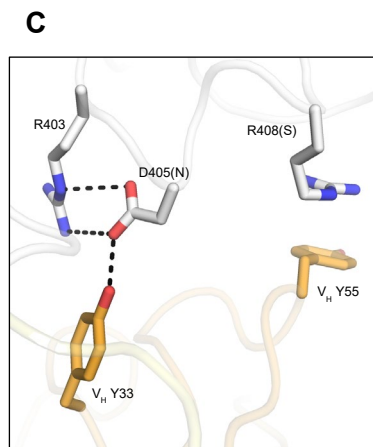

108

109 **Fig. S9. Mutations of the Omicron BA.2 sub-lineage on the RBD.** (A) Structural comparison  
 110 between the ADG20-bound wild-type SARS-CoV-2 RBD, Omicron BA.1 and BA.2 RBDs. Crystal  
 111 structure of ADG20 (heavy chain: orange, light chain: yellow) in complex with wild-type SARS-  
 112 CoV-2 RBD (white) is from this study (PDB 7U2D). The superimposed Omicron BA.1 RBD (pink)  
 113 and BA.2 RBD (green) are extracted from structures in PDBs 7QNW and 7UB5, respectively (10,  
 114 11). The 371-376 loop is highlighted in a red frame and has different backbone conformations in  
 115 wild-type SARS-CoV-2, Omicron BA.1 (S371L, S373P, and S375F), and BA.2 (S371F, S373P,  
 116 S375F, and T376A) The loop containing these mutations is also close to the glycan at N343.  
 117 Changes in this region appear to affect ADG20 binding. (B) The RBD is represented by a  
 118 transparent white surface. The ADG20 epitope is outlined. Mutated residues in the Omicron BA.2  
 119 variant are shown as red spheres, with those only in BA.2 but not BA.1 shown in blue. (C)

120 Detailed interactions between ADG20 (orange) and wild-type SARS-CoV-2 RBD (white). BA.2-  
121 specific mutations are shown in brackets in the labels. Mutation R408S may disrupt the cation- $\pi$   
122 bond formed with ADG20 V<sub>H</sub> Y55, whereas D405N may retain hydrogen bonds with ADG20 V<sub>H</sub>  
123 Y33 and RBD-R403 but lose a salt bridge with RBD-R403.  
124

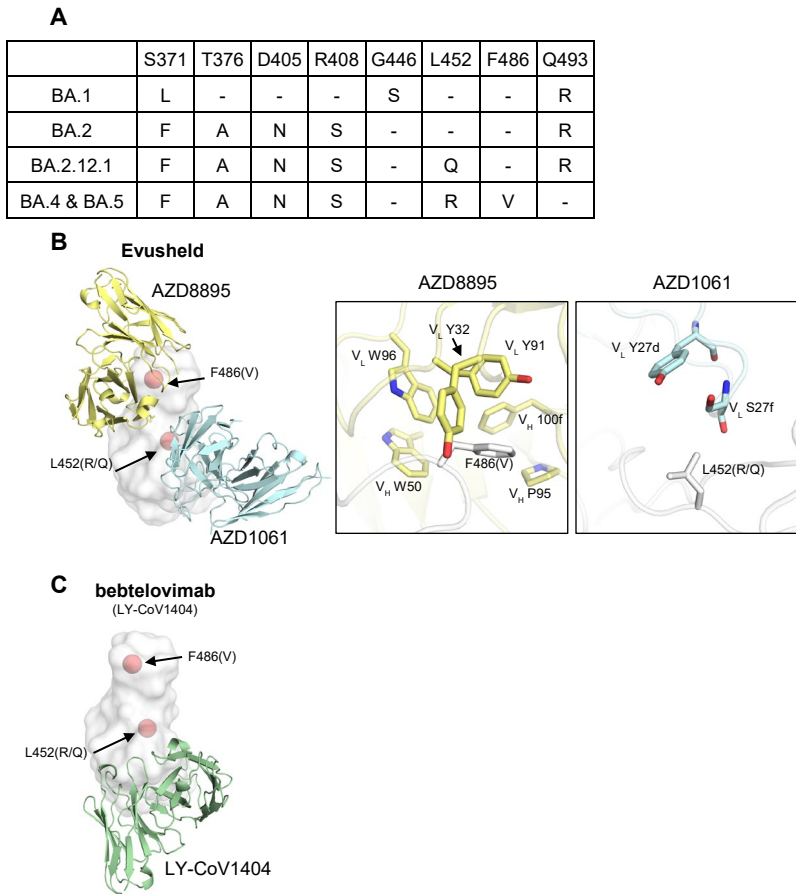

126

127

**Fig. S10. Mutations in variants BA.2.12.1, BA.4, and BA.5 and their interactions with**

128

**therapeutic antibodies.** (A) Residues on the RBD of wild-type SARS-CoV-2 that differ in

129

Omicron sub-lineages BA.1, BA.2, BA.2.12.1, BA.4, and BA.5 are indicated. Wild-type residues

130

are shown in the first row, while residues in the Omicron variants are in the rows below. The same

131

residues are represented by '-'. (B-C) Interactions between emerging mutations F486V and

132

L452Q/R versus Evusheld (AZD8895 + AZD1061, PDB: 7L7E) and bebtelovimab (7MMO). Kabat

133

numbering is assigned to all antibody residues.

134

135 **Table S1. X-ray data collection and refinement statistics**

| <b>Data collection</b>                                               | ADG-20 + SARS-CoV-2 RBD    | ADI-55688 + SARS-CoV-2 RBD |
|----------------------------------------------------------------------|----------------------------|----------------------------|
| Beamline                                                             | APS23ID-B                  | SSRL12-1                   |
| Wavelength (Å)                                                       | 1.0332                     | 0.9795                     |
| Space group                                                          | P 4 <sub>1</sub>           | P 4 <sub>1</sub>           |
| Unit cell parameters                                                 |                            |                            |
| a, b, c (Å)                                                          | 101.1, 101.1, 80.6         | 101.0, 101.0, 79.9         |
| α, β, γ (°)                                                          | 90, 90, 90                 | 90, 90, 90                 |
| Resolution (Å) <sup>a</sup>                                          | 50.0-2.75 (2.81-2.75)      | 50.0-2.85 (2.90-2.85)      |
| Unique reflections                                                   | 20,542 (2064) <sup>a</sup> | 18,826 (1811) <sup>a</sup> |
| Redundancy                                                           | 11.2 (6.5)                 | 8.9 (7.3)                  |
| Completeness (%)                                                     | 97.6 (98.1)                | 100.0 (99.9)               |
| <I/σ <sub>I</sub> >                                                  | 19.9 (1.0)                 | 15.1 (1.0)                 |
| R <sub>sym</sub> <sup>b</sup> (%)                                    | 11.4 (98.9)                | 14.5 (>100)                |
| R <sub>pim</sub> <sup>b</sup> (%)                                    | 3.4 (38.3)                 | 5.1 (51.3)                 |
| CC <sub>1/2</sub> <sup>c</sup> (%)                                   | 99.7 (69.3)                | 98.9 (59.0)                |
| <b>Refinement statistics</b>                                         |                            |                            |
| Resolution (Å)                                                       | 35.7-2.75                  | 39.3-2.85                  |
| Reflections (work)                                                   | 20,538                     | 18,820                     |
| Reflections (test)                                                   | 1,025                      | 1,882                      |
| R <sub>cryst</sub> <sup>d</sup> / R <sub>free</sub> <sup>e</sup> (%) | 21.9/25.8                  | 25.4/28.4                  |
| No. of atoms                                                         | 4,873                      | 4,837                      |
| RBD                                                                  | 1,561                      | 1,561                      |
| Fab                                                                  | 3,240                      | 3,231                      |
| Ligands <sup>f</sup>                                                 | 38                         | 45                         |
| Solvent                                                              | 34                         | 0                          |
| Average B-values (Å <sup>2</sup> )                                   | 72                         | 66                         |
| RBD                                                                  | 69                         | 67                         |
| Fab                                                                  | 73                         | 65                         |
| Ligands                                                              | 119                        | 68                         |
| Solvent                                                              | 56                         | N/A                        |
| Wilson B-value (Å <sup>2</sup> )                                     | 72                         | 70                         |
| <b>RMSD from ideal geometry</b>                                      |                            |                            |
| Bond length (Å)                                                      | 0.002                      | 0.002                      |
| Bond angle (°)                                                       | 0.57                       | 0.57                       |
| <b>Ramachandran statistics (%)<sup>g</sup></b>                       |                            |                            |
| Favored                                                              | 96.1                       | 96.1                       |
| Outliers                                                             | 0.16                       | 0.00                       |
| <b>PDB code</b>                                                      | 7U2D                       | 7U2E                       |

136

137

138

139

140

141

142

143

144

<sup>a</sup> Numbers in parentheses throughout refer to the highest resolution shell.

<sup>b</sup>  $R_{sym} = \sum_{hkl} \sum_i |I_{hkl,i} - \langle I_{hkl} \rangle| / \sum_{hkl} \sum_i I_{hkl,i}$  and  $R_{pim} = \sum_{hkl} (1/(n-1))^{1/2} \sum_i |I_{hkl,i} - \langle I_{hkl} \rangle| / \sum_{hkl} \sum_i I_{hkl,i}$ , where  $I_{hkl,i}$  is the scaled intensity of the  $i^{\text{th}}$  measurement of reflection  $h, k, l$ ,  $\langle I_{hkl} \rangle$  is the average intensity for that reflection, and  $n$  is the redundancy.

<sup>c</sup>  $CC_{1/2}$  = Pearson correlation coefficient between two random half datasets.

<sup>d</sup>  $R_{cryst} = \sum_{hkl} |F_o - F_c| / \sum_{hkl} |F_o| \times 100$ , where  $F_o$  and  $F_c$  are the observed and calculated structure factors, respectively.

<sup>e</sup>  $R_{free}$  was calculated as for  $R_{cryst}$ , but on a test set comprising 5% or 10% of the data excluded from refinement.

<sup>f</sup> Bound ligands are SO<sub>4</sub> and citrate.

<sup>g</sup> From MolProbity (12).



145 **Table S2. Hydrogen bonds and salt bridges identified at the antibody-RBD interface using**  
 146 **the PISA program.**

| ADG-20                | Distance [Å] | SARS-CoV-2 RBD |
|-----------------------|--------------|----------------|
| <b>Hydrogen bonds</b> |              |                |
| VH:SER56[OG]          | 3.8          | ASP405[O]      |
| VH:TYR33[OH]          | 2.7          | ASP405[OD2]    |
| VH:THR100E[OG1]       | 3.3          | THR500[O]      |
| VH:GLU52A[OE2]        | 3.7          | ASN501[OD1]    |
| VH:THR100[O]          | 3.0          | GLN498[NE2]    |
| VH:HIS99[O]           | 3.2          | GLN498[NE2]    |
| VH:ALA100A[O]         | 2.5          | THR500[OG1]    |
| VH:ALA100A[O]         | 3.7          | ASN501[N]      |
| VH:THR100[O]          | 3.5          | ASN501[ND2]    |
| VH:THR100E[OG1]       | 3.8          | GLY502[N]      |
| VH:ALA100C[O]         | 2.8          | GLY502[N]      |
| VH:GLU52A[OE2]        | 2.8          | TYR505[OH]     |
| <b>Salt bridges</b>   |              |                |
| VH:GLU52A[OE1]        | 3.8          | ARG403[NH2]    |
| VH:GLU52A[OE2]        | 2.5          | ARG403[NH2]    |

| ADI-55688             | Distance [Å] | SARS-CoV-2 RBD |
|-----------------------|--------------|----------------|
| <b>Hydrogen bonds</b> |              |                |
| VH:TYR33[OH]          | 2.8          | ASP405[OD2]    |
| VH:THR100E[OG1]       | 3.3          | THR500[O]      |
| VH:ALA100A[O]         | 2.4          | THR500[OG1]    |
| VH:ALA100A[O]         | 3.7          | ASN501[N]      |
| VH:THR100[O]          | 3.5          | ASN501[ND2]    |
| VH:ALA100A[O]         | 2.9          | ASN501[ND2]    |
| VH:ALA100C[O]         | 2.6          | GLY502[N]      |
| VH:TYR33[OH]          | 2.8          | ASP405[OD2]    |
| VH:THR100E[OG1]       | 3.3          | THR500[O]      |
| L:TYR31[OH]           | 2.7          | GLN506[NE2]    |
| L:TYR91[OH]           | 3.0          | VAL503[N]      |

147

148 **Table S3. Putative germline genes and CDR H3 sequences of antibodies targeting the**  
 149 **RBS-D/CR3022 epitope**

|                | <b>IGHV</b>         | <b>IGK(L)V</b>      | <b>CDR H3 sequence</b>   | <b>Reference</b> |
|----------------|---------------------|---------------------|--------------------------|------------------|
| <b>ADG-20</b>  | IGHV3-21            | IGLV1-40            | ARDFSGHTAWAGTGFY         | (13), this study |
| <b>DH1047</b>  | IGHV1-46            | IGKV4-1             | ARDVRVDDSWSGYDLLSGGTYFDY | (6, 14)          |
| <b>S2X259</b>  | IGHV1-69            | IGLV1-40            | ARGFNGNYYGWGDDDAFDI      | (5)              |
| <b>K398.22</b> | Macaque<br>IGHV3-73 | Macaque<br>IGLV2-32 | TRVSIFGQFIVATYFDY        | (7)              |

150

151 **SI References**

- 152 1. W. Yin *et al.*, Structures of the Omicron spike trimer with ACE2 and an anti-Omicron  
153 antibody. *Science* **375**, 1048-1053 (2022).
- 154 2. W. Dejnirattisai *et al.*, The antigenic anatomy of SARS-CoV-2 receptor binding domain.  
155 *Cell* **184**, 2183-2200.e22 (2021).
- 156 3. M. Yuan *et al.*, Structural and functional ramifications of antigenic drift in recent SARS-  
157 CoV-2 variants. *Science* **373**, 818-823 (2021).
- 158 4. C. O. Barnes *et al.*, SARS-CoV-2 neutralizing antibody structures inform therapeutic  
159 strategies. *Nature* **588**, 682–687 (2020).
- 160 5. M. A. Tortorici *et al.*, Broad sarbecovirus neutralization by a human monoclonal antibody.  
161 *Nature* **597**, 103-108 (2021).
- 162 6. D. Li *et al.*, In vitro and in vivo functions of SARS-CoV-2 infection-enhancing and  
163 neutralizing antibodies. *Cell* **184**, 4203-4219.e32 (2021).
- 164 7. W.-t. He *et al.*, Broadly neutralizing antibodies to SARS-related viruses can be readily  
165 induced in rhesus macaques. *bioRxiv* 10.1101/2021.07.05.451222 (2021).
- 166 8. J. Hansen *et al.*, Studies in humanized mice and convalescent humans yield a SARS-  
167 CoV-2 antibody cocktail. *Science* **369**, 1010-1014 (2020).
- 168 9. J. Dong *et al.*, Genetic and structural basis for SARS-CoV-2 variant neutralization by a  
169 two-antibody cocktail. *Nat. Microbiol.* **6**, 1233-1244 (2021).
- 170 10. W. Dejnirattisai *et al.*, SARS-CoV-2 Omicron-B.1.1.529 leads to widespread escape from  
171 neutralizing antibody responses. *Cell* **185**, 467-484.e15 (2022).
- 172 11. V. Stalls *et al.*, Cryo-EM structures of SARS-CoV-2 Omicron BA.2 spike. *bioRxiv*  
173 10.1101/2022.04.07.487528 (2022).
- 174 12. V. B. Chen *et al.*, MolProbity: all-atom structure validation for macromolecular  
175 crystallography. *Acta Crystallogr. D Biol. Crystallogr.* **66**, 12-21 (2010).
- 176 13. C. G. Rappazzo *et al.*, Broad and potent activity against SARS-like viruses by an  
177 engineered human monoclonal antibody. *Science* **371**, 823-829 (2021).
- 178 14. D. R. Martinez *et al.*, A broadly cross-reactive antibody neutralizes and protects against  
179 sarbecovirus challenge in mice. *Sci. Transl. Med.* **14**, eabj7125 (2022).
- 180
